# Supplementary material for: Facile synthesis of Mn6.87(OH)3(VO4)3.6(V2O7)0.2microtubes and their application as an anode material for lithium-ion batteries
Source: Royal Society of Chemistry journal article supplement (doi:10.1039/c5ra17160a), 2015-01-01
Supplement: c5ra17160a1.pdf [file c5ra17160a1.pdf]

## Supporting Information

### Facile synthesis of $\text{Mn}_{6.87}(\text{OH})_3(\text{VO}_4)_{3.6}(\text{V}_2\text{O}_7)_{0.2}$ microtubes and their application as anode materials for lithium-ion batteries

Shaoyan Zhang\* and Yuanyuan Zhang

College of Chemical Engineering, Shijiazhuang University, Hebei Province, Shijiazhuang, 050035, China.

Tel: +86-311-66617326; E-mail: zsyedu@hotmail.com

Figure S1 showed the XRD pattern of the  $\text{Mn}_{6.87}(\text{OH})_3(\text{VO}_4)_{3.6}(\text{V}_2\text{O}_7)_{0.2}$  microtubes obtained under pH of 8 and 240 °C for 6 h. All of the reflections could be readily indexed to pure phase of  $\text{Mn}_{6.87}(\text{OH})_3(\text{VO}_4)_{3.6}(\text{V}_2\text{O}_7)_{0.2}$  with the hexagonal structure [JCPDS Card No. 50-1796]. No other impurities were detected, indicating the high purity of the product and completed reaction during the process.

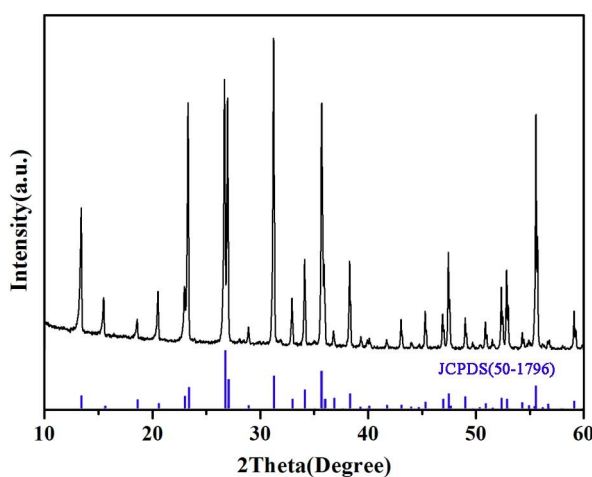

**Figure S1.** The XRD pattern of the sample obtained at 240 °C for 6 h.

The FESEM image in Figure S2 indicated that the sample was present in straight tubular structure. The outer diameter of the open-ended microtube was approximately 4  $\mu\text{m}$ , the wall thickness of the microtubes was about 500 nm.

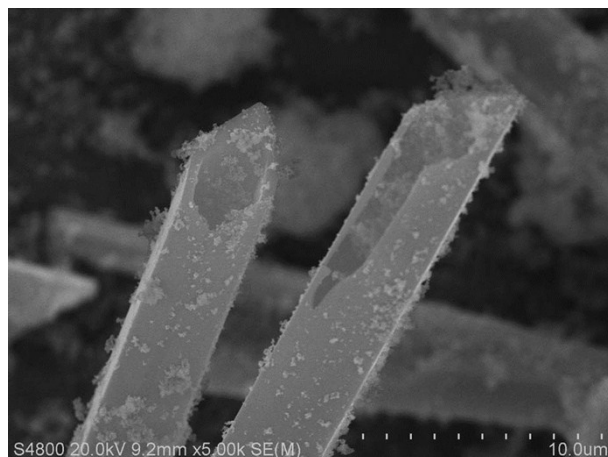

**Figure S2.** FESEM image of the sample obtained at 240  $^{\circ}\text{C}$  for 6 h.

Figure S3 showed the XRD pattern of the  $\text{Mn}_{6.87}(\text{OH})_3(\text{VO}_4)_{3.6}(\text{V}_2\text{O}_7)_{0.2}$  microtubes obtained by using  $\text{MnCl}_2$  as manganese salt. All of the reflections could be readily indexed to pure phase of  $\text{Mn}_{6.87}(\text{OH})_3(\text{VO}_4)_{3.6}(\text{V}_2\text{O}_7)_{0.2}$  with the hexagonal structure [JCPDS Card No. 50-1796]. Figure S4 displayed the FESEM images of the as-prepared  $\text{Mn}_{6.87}(\text{OH})_3(\text{VO}_4)_{3.6}(\text{V}_2\text{O}_7)_{0.2}$  microtube at different magnification. It indicated that the sample was present in straight tubular structure. The outer diameter of the open-ended microtube was approximately 4  $\mu\text{m}$ , the wall thickness of the microtubes was about 600 nm.

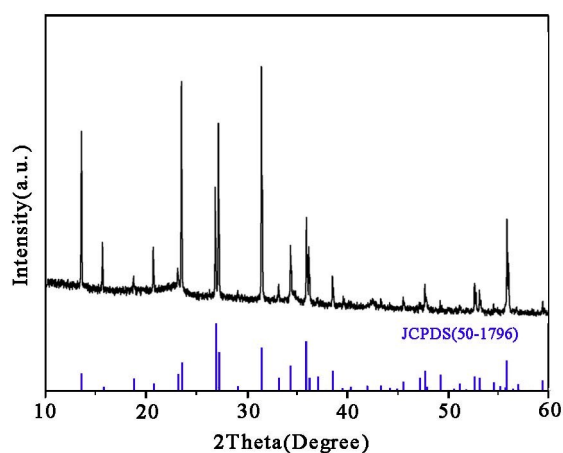

**Figure S3.** The XRD pattern of the sample obtained at 260  $^{\circ}\text{C}$  for 6 h.

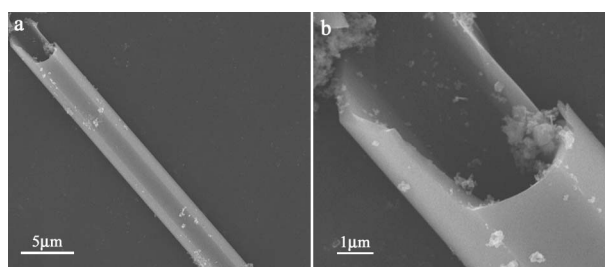

**Figure S4.** FESEM images of the sample obtained at 260 °C for 6 h.

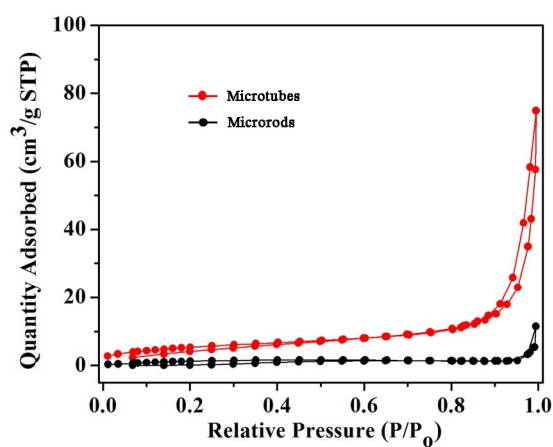

**Figure S5.** N<sub>2</sub> adsorption/desorption isotherms of the as-prepared Mn<sub>6.87</sub>(OH)<sub>3</sub>(VO<sub>4</sub>)<sub>3.6</sub>(V<sub>2</sub>O<sub>7</sub>)<sub>0.2</sub> microtubes and microrods.

**Table S1** BET data derived from the N<sub>2</sub> adsorption/desorption isotherms of the Mn<sub>6.87</sub>(OH)<sub>3</sub>(VO<sub>4</sub>)<sub>3.6</sub>(V<sub>2</sub>O<sub>7</sub>)<sub>0.2</sub> microtubes and microrods.

| Sample     | Total pore volume<br>(cm <sup>3</sup> g <sup>-1</sup> ) | BET surface area<br>(m <sup>2</sup> g <sup>-1</sup> ) |
|------------|---------------------------------------------------------|-------------------------------------------------------|
| Microtubes | 0.1159                                                  | 19.4                                                  |
| Microrods  | 0.0177                                                  | 5.4                                                   |

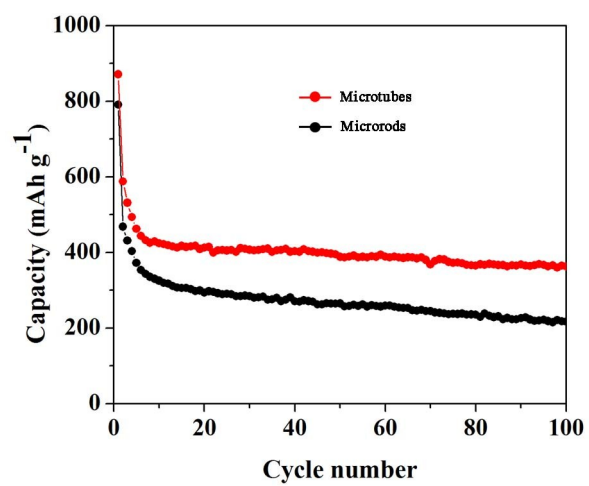

**Figure S6.** Cycling performance of the  $\text{Mn}_{6.87}(\text{OH})_3(\text{VO}_4)_{3.6}(\text{V}_2\text{O}_7)_{0.2}$  microtubes and microrods at a current density of  $200 \text{ mA g}^{-1}$ .
